# Supplementary material
Source: Springer Nature journal article supplement (https://www.springermedizin.de/resource/supplementary/12899_2010_174_MOESM1_ESM.pdf/9514638)

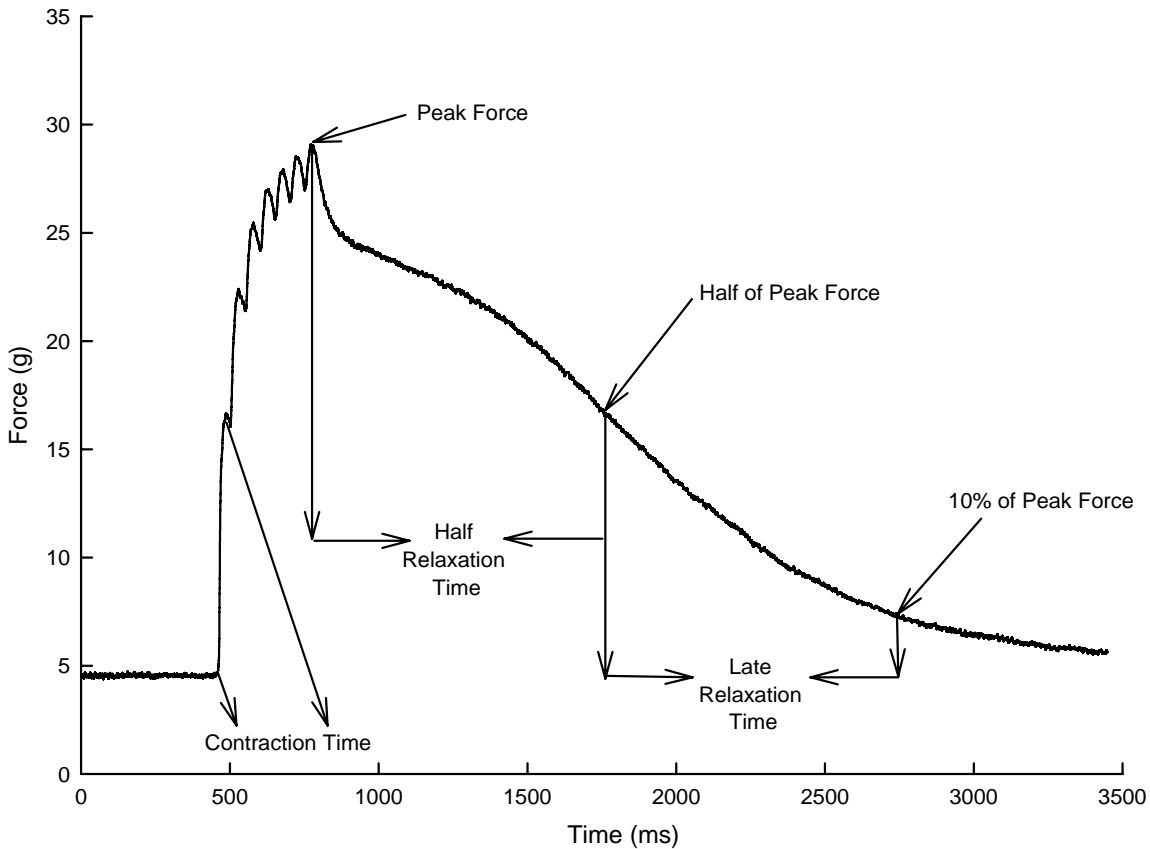

Supplement: MOESM1 [file 9514638]
